1 **Investigation of acute encephalitis syndrome with implementation of metagenomic next**  
2 **generation sequencing in Nepal**

3  
4 Shrestha R<sup>#\*1,2,3</sup>, Katuwal N<sup>#1,3</sup>, Tamrakar D<sup>1,4</sup>, Tato CM<sup>5</sup>, Vanaerschot M<sup>6</sup>, Ahyong V<sup>5</sup>, Gil J<sup>5</sup>,  
5 Madhup SK<sup>7</sup>, Gupta BP<sup>8</sup>, Jha R<sup>9</sup>

6  
7 1 Center for Infectious Disease Research and Surveillance, Dhulikhel Hospital Kathmandu University  
8 Hospital, Nepal

9 2 Department of Pharmacology, Kathmandu University School of Medical Sciences, Nepal

10 3 Molecular and Genome Sequencing Research Lab, Dhulikhel Hospital Kathmandu University  
11 Hospital, Nepal

12 4 Department of Community Medicine, Kathmandu University School of Medical Sciences, Nepal

13 5 Rapid Response Team, Chan Zuckerberg Biohub, USA

14 6 Roche Diagnostics, USA

15 7 Department of Microbiology, Kathmandu University School of Medical Sciences, Nepal

16 8 World Health Organization, Nepal

17 9 National Public Health Laboratory, Nepal

18  
19 \* Corresponding Author

20 Email: [rajeev.shrestha@kusms.edu.np](mailto:rajeev.shrestha@kusms.edu.np)

21  
22 # These authors contributed equally to this work.

23  
24  
25 **Word Count (Introduction, Methods, Results, Discussion and Conclusion): 3264**

26 **Abstract Word Count: 292**

27 **Figures: 6**

28 **Tables: 1**

29

30

31

32

33

34

35

36

37

38

39

40

41

42

43

44

45

46

47

48

49 **Abstract**

## 50 **Background**

51 The causative agents of Acute Encephalitis Syndrome remain unknown in 68-75% of the cases. In  
52 Nepal, the cases are tested only for Japanese encephalitis, which constitutes only about 15% of the  
53 cases. However, there could be several organisms, including vaccine-preventable etiologies that cause  
54 acute encephalitis, when identified could direct public health efforts for prevention, including  
55 addressing gaps in vaccine coverage.

## 56 **Objectives**

57 This study employs metagenomic next-generation-sequencing in the exploration of infectious etiologies  
58 contributing to acute encephalitis syndrome in Nepal.

## 59 **Methods**

60 In this study, we investigated 90, Japanese-encephalitis-negative, banked cerebrospinal fluid samples  
61 that were collected as part of a national surveillance network in 2016 and 2017. Randomisation was  
62 done to include three age groups (<5-years; 5-14-years; >15-years). Only some metadata (age and  
63 gender) were available. The investigation was performed in two batches which included total nucleic-  
64 acid extraction, followed by individual library preparation (DNA and RNA) and sequencing on  
65 Illumina iSeq100. The genomic data were interpreted using Chan-Zuckerberg-ID and confirmed with  
66 polymerase-chain-reaction.

## 67 **Results**

68 Human-alpha herpesvirus-2 and Enterovirus-B were seen in two samples. These hits were confirmed by  
69 qPCR and semi-nested PCR respectively. Most of the other samples were marred by low abundance of  
70 pathogen, possible freeze-thaw cycles, lack of process controls and associated clinical metadata.

71

## 72 **Conclusion**

73 From this study, two documented causative agents were revealed through metagenomic next-  
74 generation-sequencing. Insufficiency of clinical metadata, process controls, low pathogen abundance  
75 and absence of standard procedures to collect and store samples in nucleic-acid protectants could have  
76 impeded the study and incorporated ambiguity while correlating the identified hits to infection.  
77 Therefore, there is need of standardized procedures for sample collection, inclusion of process controls  
78 and clinical metadata. Despite challenging conditions, this study highlights the usefulness of mNGS to  
79 investigate diseases with unknown etiologies and guide development of adequate clinical-management-  
80 algorithms and outbreak investigations in Nepal.

81

82 **Keywords:** acute encephalitis syndrome, enterovirus, Human-alphaherpes-virus, metagenomic next  
83 generation sequencing, Nepal

84

85

86

87

88

89

90

91

92

93

94

95

96 **Background**

97 Acute Encephalitis Syndrome (AES) is defined by acute onset of fever and a change in mental status  
98 (including symptoms such as confusion, disorientation, coma, or inability to talk) and/or new onset of  
99 seizures (excluding simple febrile seizures) in a person of any age at any time of year.<sup>1</sup> This term was  
100 coined by World Health Organization (WHO) in 2008.<sup>1</sup> Globally, based on various studies, the  
101 incidence of AES has ranged from 3.5 to 7.4 per 100,000 patients-years, with a higher incidence among  
102 children.<sup>2</sup>

103 The patients suffering from AES usually present acute onset of fever and altered sensorium. This is  
104 followed by rapidly worsening clinical conditions and death.<sup>3</sup> The survivors can suffer from long term  
105 health issues, including neurological sequelae.<sup>3,4</sup> The etiologies behind AES can be grouped under  
106 infective and non-infective categories, with the infective category comprising of a broad range of  
107 organisms (bacteria, virus, parasites).<sup>2,5</sup> The causative agents of AES also vary with season and  
108 geographic location.<sup>6</sup> Research has shown that the etiologies of AES remain unknown in 68-75% of the  
109 cases, while Japanese encephalitis (JE) constitutes about 15% of the cases.<sup>7-10</sup> The landscape of AES, in  
110 terms of etiology, has changed in India as well, where outbreak investigations and surveillance studies  
111 have increasingly reported non-JEV etiologies.<sup>11</sup>

112 In Nepal, JE is majorly associated with mortality and morbidity among children.<sup>12</sup> Therefore, since  
113 2004, the Ministry of Health and Population of Nepal, supported by the Office of Infection Prevention  
114 Division, World Health Organisation (WHO), has integrated JE surveillance with Acute Flaccid  
115 Paralysis, Neonatal Tetanus, and Measles in its National Surveillance Network.<sup>13</sup> Until 2011, over  
116 23,000 AES cases were reported by the surveillance network.<sup>14</sup> Due to a lack of knowledge in etiology,  
117 AES cases are only tested for JE and clinical management is performed based on this result. The  
118 incidence of undiagnosed AES etiology contributes to a high rate of death and morbidity.<sup>14</sup> There could  
119 be several etiologies, including vaccine preventable etiologies, that cause acute encephalitis, which  
120 upon identification could direct public health efforts for prevention, including expanded use of vaccines  
121 or addressing gaps in vaccine coverage. Herpes Simplex Virus (HSV), Varicella-Zoster Virus (VSV),

122 Enterovirus, Adenovirus, and Rubella, as well as emerging pathogens such as Nipah, Chandipura and  
123 Chikungunya have all been reported as causative viral agents of AES, while *Neisseria meningitidis*,  
124 *Streptococcus pneumoniae*, *Listeria* sp, and *Brucella* have been reported as causative bacterial  
125 agents.<sup>2,15,16, 17</sup>

126 While molecular methods such as PCR require prior genetic information on causative agents, genomic  
127 methods such as metagenomic Next Generation Sequencing (mNGS) can simultaneously identify  
128 minute amounts of infections and co-infections of varying origin in a single investigation and assist in  
129 the investigation of transmission of such infections.<sup>18, 19</sup> With the recent dramatic decrease in  
130 sequencing costs, this technology provides access to genomic information in a scale that can be  
131 implemented to fill gaps in routine clinical practice and address epidemiological questions. In addition  
132 to identification (identifying genotypes, virulence or pathogenesis), NGS provide information  
133 epidemiological investigation (comparative genomics, phylogenetic analysis).<sup>20, 21, 22, 23</sup>

134 This study, employing mNGS to explore the infective etiologies behind AES, complements a growing  
135 number of studies that have used a similar approach to investigate encephalitis, including in a LMIC  
136 context.<sup>16,24,25,26</sup> The identification of such etiologies is an important step in developing effective  
137 prevention and treatment measures which in turn will reduce disability and morbidity.

## 138 **Methods**

### 139 **Sample Collection and Selection**

140 The investigation included a random selection of 90 retrospective cerebrospinal fluid (CSF) samples  
141 that were collected by WHO-IPD (World Health Organization-Immunization Preventable Diseases),  
142 throughout Nepal, as a part of the National AES Surveillance Network in collaboration with FWD  
143 (Family Welfare Department) in 2016 and 2017. These samples had been tested for JE at NPHL  
144 (National Public Health Laboratory) and stored at low but undocumented temperature. For this study,  
145 only those samples that tested negative for JE were selected. Randomisation was done to include three

146 age groups of <5 years, 5-14 years, and >15 years. Only some metadata related to the subjects (age and  
147 gender) were known. Each sample was provided with unique study codes to maintain privacy.

148

## 149 **Nucleic Acid Extraction and mNGS**

150 Total Nucleic Acid was extracted from the CSF samples using Zymo Quick-DNA/RNA™ Pathogen  
151 MiniPrep (R1042).

152 The total nucleic acid samples were aliquoted into two sub samples for RNA and DNA library  
153 preparation, respectively. The library preparations were done using NEB Library Prep Kit Ultra II RNA  
154 for RNA (New England Biolabs, E7770S) library preparation, and NEB Library Prep Kit Ultra II FS  
155 DNA for DNA library preparation (New England Biolabs, E7805S). The library preparation for the  
156 first 30 samples was done in a single batch (at Chan Zuckerberg Biohub, USA) while the remaining 60  
157 samples were done in three batches of 20 samples each (at Dhulikhel Hospital Kathmandu University  
158 Hospital, Nepal). Negative extraction and library preparation controls were included in each batch. The  
159 library preparation included 10ng of input nucleic acid, followed by fragmentation, adapter ligation,  
160 cleanup (Solid Phase Reversible Immobilization beads), barcoding and amplification of library for 12-  
161 16 cycles. With subsequent library preparations, quality control was done using agarose gel  
162 electrophoresis and Tapestation 4200 platform from Agilent Technologies and later by qPCR using  
163 Kapa Illumina Library Amplification (KK2702) and Quantitation Complete Kit (KK4923). It was made  
164 sure that the length of DNA in the libraries was around 350-400bp and had concentration >1nM. In  
165 RNA library preparation, ERCC (External Control Controls Consortium, 4456740) RNA Spike-in  
166 controls were used as internal controls.

167 The libraries that passed quality control filters were pooled and run on an Illumina iSeq100 sequencer.

168 The sequencing was performed for 2x146bp length using custom unique dual indices of 12 bp length.

169 5% PhiX was added as an internal control for sequencing. The loading concentration of pooled libraries  
170 was maintained at 100-120pM.

171

## 172 **Data Analysis**

173 The analysis was performed on the CZ ID (formally known as IDSeq) platform developed by Chan  
174 Zuckerberg Initiative and CZ Biohub. CZID accepts raw sequencing data, perform host and quality  
175 filtration, followed by execution of assemblybased alignment pipeline.<sup>27</sup>The samples are analysed  
176 based on number of reads per million (Number of reads aligning to the taxon in the NCBI NR/NT  
177 database, per million reads sequenced), reads (Number of reads aligning to the taxon in the NCBI  
178 NT/NR database), contig number (Number of assembled contigs aligning to the taxon in the NCBI  
179 NT/NR database), id% and z-score. The samples were also visualized using a rpm heatmap where  
180 samples and controls are cross-matched against each other. Respective background models were  
181 created, from negative extraction and library preparation control, for RNA and DNA Libraries.

182

## 183 **PCR Confirmation**

184 Human alphaherpes virus confirmation was done by qPCR (KAPA HiFi HotStart Ready Mix) using  
185 two primer sets: established primers (FP: 5'TGCAGTTTACGTATAACCACATACAGC 3' and RP: 5'  
186 AGCTGCGGGCCTCGTT 3') and self-designed primers (FP: 5' GACTCAAACACGTGCACCAC  
187 and RP: 5' CCATCGCGTACAGCCTACAT 3').<sup>28</sup> The primer sets were designed using NCBI primer  
188 blast and Gene Script, then checked with Beacon Designer Free and Snap Gene Viewer.

189 Similarly, for confirmation of Enterovirus, modified protocol with established primers from  
190 Enterovirus Surveillance Guidelines were used to perform semi-nested Polymerase Chain Reaction  
191 (snPCR).<sup>29</sup> The protocol followed visualisation of the bands, for confirmation, in agarose (1.5%) gel  
192 electrophoresis.



193

## 194 **Results**

### 195 **Subject Metadata**

196 The samples selected for this study were banked, retrospective CSF samples collected in 2016 and  
197 2017 with limited metadata such as age and gender. Out of the 90 subjects, 31 (34.4%) were female  
198 while the age distribution has been presented in table 1.

199 **Table 1: Age Distribution between subjects with AES**

| SN | Age Group  | Number |
|----|------------|--------|
| 1  | <5 years   | 23     |
| 2  | 5-14 years | 14     |
| 3  | >15 years  | 53     |

200 The median age of the subjects infected with AES was 20 years (IQR: 4-79 years)

### 201 **Sample collection**

202 The samples were collected in glass bottles without any preservative and transported to NPHL where  
203 they, first, had been tested for JE and subsequently stored at low temperature. As these samples were  
204 collected in 2016 and 2017 and banked, negative controls were not available during collection and  
205 transportation.

### 206 **Nucleic Acid Extraction and mNGS**

207 The extracted nucleic acid had a concentration ranging from too low to detect to 222 ng/ul. As the  
208 analysis was done in two sets. Each set was processed for DNA and RNA Library Preparation and has  
209 been presented accordingly. Out of 90 samples, only two samples showed confirmed hits from  
210 Enterovirus B and Human alphaherpesvirus 2, respectively.



226 in all of the samples including few negative controls. There was similar trend, in both sets, with other  
227 organism such as Sphingomonas, Acinetobacter, Escherichia and others.  
228 Interestingly, only AES\_S47\_RNA showed a hit to Enterovirus B (strain Human coxsackievirus B1).  
229 This hit was particular to sample 47 and not seen in any negative controls. The metrics such as rPM of  
230 359,409.1 (provides information of the abundance of a specific microbe within the sample), NT L  
231 (depicts the length of aligned sequence in base pair), Z score of 99 (shows the significance of any hit  
232 compared to the background), coverage visualization (assess breadth and depths of reads) and id of  
233 85.8% signify that the organism hit is highly similar to the reference organism.<sup>30</sup> The figure below  
234 shows the abundance of Enterovirus B in Sample 47 (NT rPM  $\geq 10$  and NT L  $\geq 50$ ). The coverage  
235 breadth of this hit was 98.7% with depth of 700.4x as seen in Figure 3.

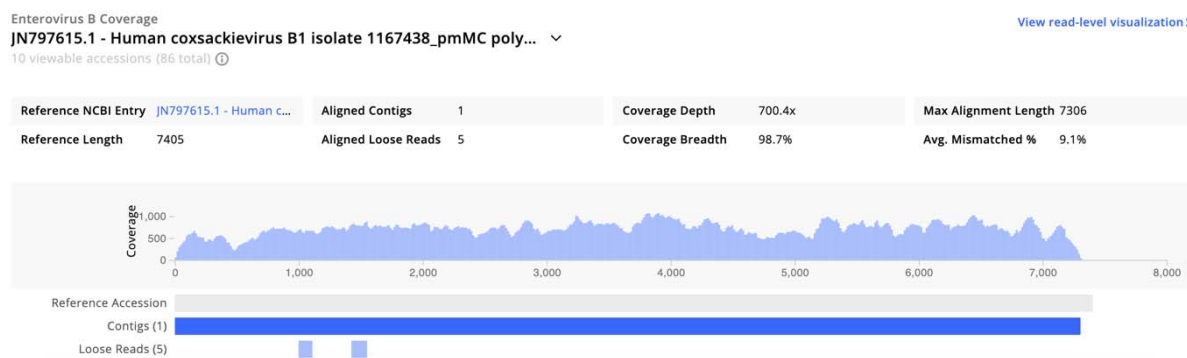

236  
237 *Figure 3: Coverage visualisation of Enterovirus in AES\_S47\_RNA from CZID, depicting the coverage metrics of the contigs*  
238 *generated for the particular hit along with coverage depth and width. The hit was visualised with the threshold of NT rPM*  
239  *$\geq 10$  and NT L  $\geq 50$ .*

240 The strain Human coxsackievirus B1, from our study, was found similar to Coxsackievirus B1  
241 responsible in mesangial renal disease.<sup>28</sup> The genome similarly was also observed in genomes from  
242 coxsackievirus viruses causing myocarditis, severe gastroenteritis, food-and-mouth disease, respiratory  
243 distress, shown in Figure 4.<sup>29-34</sup>

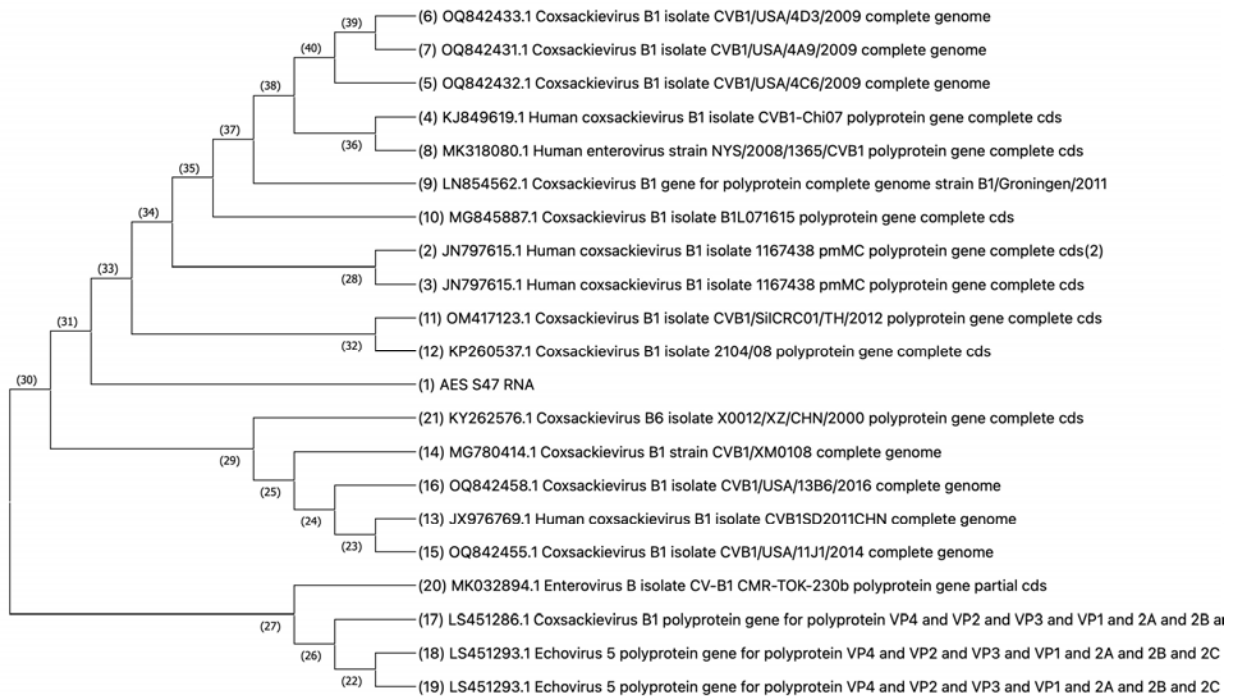

244

245 *Figure 4: Phylogenetic comparison of AES\_S47\_RNA against other coxsackievirus B1 genomes, from NCBI. This tree was*  
 246 *made using CLUSTAL W maximum likelihood statistical method, Tamura-Nei model with nearest neighbor interchange as*  
 247 *the maximum likelihood heuristic method.*

248 The strain Human coxsackievirus B1, from our study, was different (0.0569) from Enteroviruses B  
 249 isolated from an outbreak in norther India, close in Nepal.<sup>62</sup> (Figure 5)

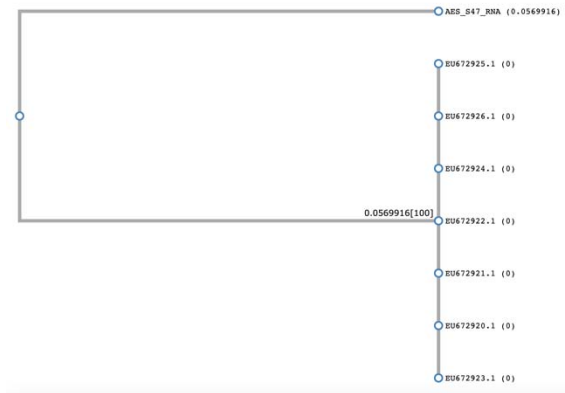

250

251 *Figure 5: Phylogenetic comparison of AES\_S47\_RNA against coxsackievirus B genomes isolated from an outbreak in India,*  
 252 *based on based on partial 5' noncoding region sequences. This tree was made using CLUSTALW.*

253

254

## 255 mNGS of DNA Libraries

256 In mNGS of DNA libraries, hits were observed for Human alphaherpesvirus 2 [AES\_S28\_DNA] from  
257 the first set. The same sample showed hit for Human alphaherpesvirus 1, but in a very low abundance,  
258 shown in figure 4. Additionally, background contaminants (laboratory and hospital) were seen in the  
259 water controls in this DNA sequencing result as well. Similar to RNA Libraries, most of the samples  
260 showed hits for Sphingomonas spp, Pseudomonas spp, and Acinetobacter spp. Nevertheless, the figure  
261 5 depicts the result of the hit where there were 2,598.6 rPM for Human alphaherpesvirus 2.

262

AES\_S28\_DNA ▾ Share Download ?

Metagenomic

Taxon name  Name Type: Scientific ▾ Background: AES\_NEPAL\_DNA\_15 Feb 2023 ▾ Categories ▾ Threshold filters: 2 ▾

Read Specificity: Specific Only ▾ Annotation ▾

NT rPM >= 10 X NT L (alignment length in bp) >= 50 X

86 rows passing the above filters, out of 867 total rows CLEAR FILTERS

| ▼ | Taxon                                                | Score ▾    | Z ...          | rPM                | r              | con... | con... | %...          | L             | Ev... | NT<br>NR                               |
|---|------------------------------------------------------|------------|----------------|--------------------|----------------|--------|--------|---------------|---------------|-------|----------------------------------------|
| ▼ | Simplexvirus ( 2 viral species: 2 )                  | 47,544,114 | 100.0<br>100.0 | 2,617.4<br>2,229.9 | 1,324<br>1,128 | 0<br>0 | 0<br>0 | 99.9<br>99.5  | 128.8<br>44.8 |       | 10 <sup>-76</sup><br>10 <sup>-16</sup> |
| ▾ | Human alphaherpesvirus 2 <span>Known Pathogen</span> | 47,544,114 | 100.0<br>100.0 | 2,597.6<br>2,156.8 | 1,314<br>1,091 | 0<br>0 | 0<br>0 | 99.9<br>99.5  | 128.9<br>44.8 |       | 10 <sup>-76</sup><br>10 <sup>-16</sup> |
| ▾ | Human alphaherpesvirus 1 <span>Known Pathogen</span> | 889,599    | 100.0<br>100.0 | 19.8<br>69.2       | 10<br>35       | 0<br>0 | 0<br>0 | 100.0<br>99.3 | 115.9<br>43.9 |       | 10 <sup>-67</sup><br>10 <sup>-15</sup> |

263

270 Figure 6: Result from CZID depicting the details of top hits in AES\_S28\_DNA along with various metrics related to the hit.

271 The hits were visualised with the threshold of NT rPM >=10 and NT L >=50

272 However, due to lower coverage, contig visualization was not available for this hit.

273

## 274 PCR Confirmation

### 275 Confirmation of Human alphaherpesvirus 2

276 Out of the two primer sets used, the established primers fared better providing Ct value of 23.11 for  
277 Human alphaherpesvirus 2.

278

279

## 280 **Confirmation of Enterovirus B**

281 After completion of snPCR for Enterovirus, the band was seen between 700-800bp after first  
282 amplification and between 300-400bp after final amplification. This confirmed the presence of  
283 Enterovirus as per the Enterovirus Surveillance Guidelines.<sup>36</sup>

284

## 285 **Discussion**

### 286 **Demography of Acute Encephalitis Syndrome (AES)**

287 Most of the subjects suffering from AES were young male population of median age 20 years. This  
288 gender distribution was concurrent to previous studies done, in Nepal, on epidemiology of AES.<sup>37,38</sup> It  
289 has been observed that AES affects individuals from both gender and all ages, however, most of the  
290 studies have been done in younger population, as they pose high risk due to lack of developed  
291 antibodies.<sup>39-42</sup> Another study done in Nepal also observed the young median age (19 years) for AES,  
292 while others observed older population.<sup>37,38,43,44</sup>

293

### 294 **Metagenomic Next Generation Sequencing**

295 In this study, out of the 90 samples tested, most (n=88) of them could not be specified as specific hits.  
296 This was due to high level of background contaminants resulting in low confidence in calling organism  
297 hits within the experimental samples. Nevertheless, two samples showed confirmed hits for Enterovirus  
298 B and Human alphaherpesvirus 2, respectively, which differs from studies which depict that non-JE  
299 pathogens constitutes of 68-75% of AES cases.<sup>7-10</sup> Nonetheless, the absence of causative agent in  
300 remaining samples could indicate that either the samples did not have intact nucleic to start with or had  
301 low pathogen abundance or could have been degraded because the ERCCs were amply sequenced from  
302 the RNA libraries.<sup>16,45</sup>

303 As per the result of mNGS, the high Z score (99) for Enterovirus B shows that hit for the organism is  
304 present significantly in our sample, when compared to the background. The average length of  
305 alignment (as shown by L metrics) is long (L=7258.7), which confirms for a good local alignment to  
306 reference.<sup>46</sup> The id% is also higher (85.8%) meaning that the organism is highly similar to the reference  
307 organism in the database. Additionally, when the genome coverage is seen in detail, we can see that our  
308 sequenced genome depicts good coverage breadth and depth (depth of 700x and breadth of 98.7%),  
309 which is the range and uniformity of sequencing coverage for the particular hit.<sup>45</sup> The presence of  
310 ENVB was also confirmed through snPCR followed by visualization of product size specific for all  
311 enteroviruses.<sup>36</sup>

312 The hit for alphaherpesvirus 2 was considered significant because it was not present in the control  
313 samples at the thresholds used to analyse the sample (high Z score of 100%, L value of 128.9, id% of  
314 99.9%) considered reliable.<sup>24,27,47</sup> The low contig value, for this hit, could be because of the organism  
315 being present at such a low abundance that the sequencer did not sequence enough reads to generate a  
316 contig. The contig value is dependent upon the total number of reads and the size of organism's  
317 genome.<sup>48</sup> Additionally, the decreased sensitivity of mNGS due to low abundance of pathogen has been  
318 studied for CSF.<sup>49</sup> Several methods have been reported that can be used to increase the abundance of  
319 pathogen sequences or remove the unwanted host sequences.<sup>50,51</sup> Nevertheless, as this genus is  
320 associated with encephalitis, the sample was taken further for analysis.<sup>52,53</sup> During confirmation, the  
321 lower Ct value of 23.11 indicates presence of alphaherpesvirus 2, a known causative agent, in the  
322 sample.

## 323 **Enterovirus B and Human Alphaherpesvirus 2**

324 Enterovirus B is a known causative agent of encephalitis.<sup>16,54-56</sup> Enteroviruses are named by their  
325 transmission-route through the intestine.<sup>57</sup> Studies have shown that enterovirus can cause various  
326 diseases in the nervous system, including aseptic meningitis, acute paralysis, encephalitis, meningo-

327 encephalomyelitis among others, in children.<sup>58-60</sup> Additionally, strain B1 has been documented to cause  
328 encephalomyocarditis (meningoencephalitis and severe myocarditis, often accompanied by heart  
329 failure) and showed genomic similarity to the enterovirus B from our study.<sup>61</sup> Interestingly, studies in  
330 India have linked Enterovirus, among other pathogens, to AES, by various studies.<sup>62-64</sup> For instance,  
331 Enterovirus outbreak was first reported from Uttar Pradesh, India in 2006 with seasonal outbreaks with  
332 high fatality occurring for several years.<sup>62,65,66</sup> Southern Nepal borders with Uttar Pradesh, India and  
333 due to open borders and similar climate, it is plausible to find Enterovirus in CSF samples in Nepal.  
334 However, the strain of Enterovirus from our study was significantly different compared to genomes  
335 from the outbreak.<sup>62</sup> Additionally, some studies in Nepal have reported Enterovirus as possible etiology  
336 of AES for Nepal.<sup>67,68</sup>

337 Similarly, Human alphaherpesvirus 2 is known to cause encephalitis in neonates and  
338 immunocompromised patients. Herpes simplex encephalitis (HSE) has significant morbidity and  
339 mortality, even with early diagnosis and treatment.<sup>69,70</sup> HSV is found to be one of the predominant  
340 causes of AES in the western world.<sup>71-73</sup> Among herpes simplex encephalitis, the vast majority of the  
341 encephalitis is caused by HSV-1, with HSV-2 being the etiology in less than 10% of the cases.<sup>70</sup>  
342 Studies in India and Nepal have reported the presence of HSV-2 as causative agent of encephalitis,  
343 with varying range of incidence.<sup>69,74-78</sup>

344

## 345 **Clinical Data and Process Control**

346 However, due to lack of clinical metadata, the presence of Enterovirus B and Human alphaherpes 2  
347 virus could not be clinically correlated. Clinical metadata such as onset of fever, date of infection,  
348 fatality, WBC counts, adjoining infection, etc are vital to correspond with the presence of  
349 infections.<sup>16,79,80</sup>



350 Additionally, usual environmental contaminants such as *Sphingomonas* spp., *Pseudomonas* spp, or  
351 *Acinetobacter* spp were seen. For instance, *Sphingomonas* are widely distributed in nature, having been  
352 isolated from many different land and water habitats, as well as from plant root systems, clinical  
353 specimens, and other sources. This is essentially due to their ability to survive in low concentrations of  
354 nutrients.<sup>81,82</sup> Background contaminants of laboratory and hospital origin were also seen in the water  
355 controls. With appropriate use of background or negative controls, a background model can be created  
356 and subsequently subtracted from the results.<sup>16,24</sup>

## 357 **Collection Procedures**

358 The lack of identification of causative agent in other 88 samples could be because all of samples that  
359 were analysed were as old as 2016 and 2017, and could possibly have gone through numerous freeze  
360 and thaw cycles. Therefore, the collection of samples in nucleic acid protectant such as Zymo  
361 RNA/DNA Shield would have protected the nucleic acid from degradation after  
362 sampling.<sup>83,84</sup> Additionally, the causative agents could also have left the cerebrospinal fluid prior to  
363 collection depending upon the time of collection since the onset of fever, because it is advised to collect  
364 CSF within seven days of onset of fever.<sup>85</sup>

365 The possibility of freeze thaw cycles affecting the sample quality and lack of clinical metadata are  
366 limiting to the analysis, resulting in ambiguous interpretation of some samples. However, we contend  
367 that this aspect should not be corroborated as limitations, because the CSF samples analysed were not  
368 collected specifically for mNGS and there could be low abundance of the pathogen itself. Additionally,  
369 the sequencing was done in Illumina iSeq100 which has a maximum of approximately 4 million reads  
370 per run and can only accommodate a certain number of organisms with adequate coverage breadth and  
371 depth.<sup>86</sup> Therefore, more deeper sequencing using sequencer with higher reads per run, host depletion  
372 and pathogen enrichment methods can be applied for samples with low pathogen abundance.<sup>50,51</sup>

373

## 374 **Conclusion**

375 Identification and investigation of etiologies behind AES is essential for developing clinical  
376 management algorithms, improving surveillance with region-specific treatment and prevention policy  
377 as well as outbreak investigation. We do not expect the administration of mNGS as a regular diagnostic  
378 tool but rather an investigational and exploration tool to identify causative etiologies and develop  
379 molecular methods (such as qPCR) for diagnosis.

380 From this study, two documented, causative agents were revealed through metagenomic next  
381 generation sequencing and subsequently confirmed by PCR. Insufficiency of clinical metadata, process  
382 controls, and possibility of freeze thaw cycles affecting the sample quality incorporates ambiguity  
383 when correlating identified pathogens to infections. Therefore, there is a dire need of implementing  
384 standardized collection and storage procedures, including proper process controls and clinical metadata  
385 (WBC Count, primary diagnosis, discharge type, presence of another organism). Additionally, delicate  
386 samples such as CSF should be collected in a protectant and transported in a controlled and sterile  
387 environment.

388

## 389 **List of abbreviations**

390 DNA: Deoxyribose Nucleic Acid

391 RNA: Ribo-Nucleic Acid

392 PCR: Polymerase Chain Reaction

393 AES: Acute Encephalitis Syndrome

394 WHO: World Health Organization

395 JEV: Japanese Encephalitis Virus

396 HSV: Herpes Simplex Virus

397 VSV: Varicella-Zoster Virus

- 398 mNGS: metagenomic Next Generation Sequencing
- 399 NGS: Next Generation Sequencing
- 400 LMIC: Low- and Middle-Income Countries
- 401 CSF: Cerebrospinal Fluid
- 402 WHO-IPD: World Health Organization Immunization Preventable Diseases
- 403 FWD: Family Welfare Department
- 404 NPHL: National Public Health Laboratory
- 405 NEB: New England Biolabs
- 406 ERCC: External Control Controls Consortium
- 407 CZ ID: Chan Zuckerberg ID
- 408 FP: Forward Primer
- 409 RP: Reverse Primer
- 410 snPCR: semi nested Polymerase Chain Reaction
- 411 NEC: Negative Extraction Control
- 412 NLC: Negative Library Control
- 413 NT: Nucleotide
- 414 rPM: Reads per Million
- 415 NT L: Nucleotide Length
- 416 Ct: Cycle of Threshold
- 417 HSE: Herpes Simplex Encephalitis
- 418 HSV: Herpes Simplex Virus

419

420

## 421 **Declarations**

422 **Ethics approval and consent to participate**

423 This study was ethically cleared from Nepal Health Research Council (NHRC) under id: 903 – 2019.

424 This study directly did not contact the human subjects and investigated banked CSF samples and  
425 secondary metadata.

426

427 **Consent for publication**

428 Not Applicable.

429

430 **Availability of data and materials**

431 All data generated or analyzed during this study are included in this article. The pathogen genomic data  
432 can be found in Sequence Read Archive, National Center for Biotechnology Information (NCBI),  
433 under BioProject no PRJNA1019500. Further inquiries can be directed to the corresponding author.

434

435 **Competing interests**

436 The authors declare that they have no competing interests.

437

438 **Funding**

439 This study was funded by Bill and Melinda Gates Foundation under Grand Challenge Explorations  
440 Initiative with PI Prof. Dr. Rajeev Shrestha. Grant ID: OPP1211930

441

442 **Authors' contributions**

443 Conceptualization, RS; methodology, RS and NK; investigation, RS and NK; resources, MV, CMT,  
444 VA, JG, NK; data curation, RS, NK, MV; writing-original draft preparation, RS and NK; writing-  
445 review and editing, DT, CMT, MV, VA, JG, SKM, BPG, RJ; supervision, RS; project administration,  
446 RS. All authors have read and agreed to the published version of the manuscript.

## 447 **Acknowledgements**

448 We thank Bill and Melinda Gates Foundation, Grand Challenges Explorations Grant for the support.

449 We appreciate the guidance from Chan Zuckerberg Biohub, San Francisco. We express our gratitude to

450 Family Welfare Department and National Public Health Laboratory (NPHL) for supporting the study

451 by providing the samples. We also thank WHO-IPD for providing data for the study.

452

## 453 **References**

454 1. Guidelines for Surveillance of Acute Encephalitis Syndrome (With Special Reference to Japanese

455 Encephalitis) NVBDCP. 2006. Accessed: 18 July 2022. Available at:

456 <http://www.nvbdc.gov.in/Doc/AES%20guidelines.pdf>

457 2. Granerod J, Crowcroft NS. The epidemiology of acute encephalitis. *Neuropsychol Rehabil.* 2007;

458 17:406–28.

459 3. Narain JP, Dhariwal AC, MacIntyre CR. Acute encephalitis in India: an unfolding tragedy. *Indian J*

460 *Med Res.* 2017. 145:584–7.

461 4. Srivastava N, Deval H, Mittal M, Kant R, Bondre VP. The Outbreaks of Acute Encephalitis

462 Syndrome in Uttar Pradesh, India (1978-2020) and Its Effective Management: A Remarkable Public

463 Health Success Story. *Front Public Health.* 2022 Feb 9;9:793268.

464 5. Tripathy SK, Mishra P, Dwibedi B, Priyadarshini L, Das RR. Clinico-epidemiological Study of Viral

465 Acute Encephalitis Syndrome Cases and Comparison to Nonviral Cases in Children from Eastern India.

466 *J Glob Infect Dis.* 2019 Jan-Mar;11(1):7-12

467 6. National Health Mission. Routine Immunization, Government of India. Available at:

468 <http://www.nrhm.gov.in/nrhmcomponents/rmncha/immunization/background.html>

469 7. AES/JE Cases and Deaths in the Country. National Vector Borne Disease Control Programme.

470 Directorate General of Health Services. Ministry of Health and Family Welfare, Government of India.

471 2012.

- 472 8. Director, Child Health Division. Teku, Kathmandu, Nepal: Department of Health Services, Ministry  
473 of Health and Population. 2012. Acute Encephalitis Syndrome/Japanese Encephalitis Data of Nepal.
- 474 9. Cizman M, Jazbec J. Etiology of acute encephalitis in childhood in Slovenia. *Pediatr Infect Dis J*.  
475 1993. 12:903–8.
- 476 10. Potharaju NR. Incidence Rate of Acute Encephalitis Syndrome without Specific Treatment in India  
477 and Nepal. *Indian J Community Med*. 2012 Oct. 37(4):240-51.
- 478 11. Joshi R, Kalantari SP, Reingold A et al. Changing landscape of acute encephalitis syndrome in  
479 India:A systematic review. *Natl Med J India* 2012. 25:212-20.
- 480 12. Rayamajhi A, Singh R, Prasad R, Khanal B, Singhi S: Study of Japanese encephalitis and other  
481 viral encephalitis in Nepali children. *Pediatr Int*. 2007, 49 (6): 978-984.
- 482 13. Pant GR: A serological survey of pigs, horses, and ducks in Nepal for evidence of infection with  
483 Japanese encephalitis virus. *Ann N Y Acad Sci*. 2006, 1081: 124-129.
- 484 14. Rayamajhi A, Ansari I, Ledger E, Bista KP, Impoinvil DE, Nightingale S, Kumar R, Mahaseth C,  
485 Solomon T, Griffiths MJ. Clinical and prognostic features among children with acute encephalitis  
486 syndrome in Nepal; a retrospective study. *BMC Infect Dis*. 2011 Oct 28;11:294
- 487 15. Hsu, V. P., Hossein, M. J., Parashar, U. D., Ali, M. M., Ksiazek, T. G., Kuzmin, I., Niezgod, N.,  
488 Rupprecht, C., Bresee, J., & Breiman, R. F. Nipah virus encephalitis reemergence, Bangladesh.  
489 *Emerging Infectious Diseases*. 2004. 10(12), 2082 – 2087.
- 490 16. Saha S, Ramesh A, Kalantar K, Malaker R, Hasanuzzaman M, Khan LM, Mayday MY, Sajib MSI,  
491 Li LM, Langelier C, Rahman H, Crawford ED, Tato CM, Islam M, Juan YF, de Bourcy C, Dimitrov B,  
492 Wang J, Tang J, Sheu J, Egger R, De Carvalho TR, Wilson MR, Saha SK, DeRisi JL. Unbiased  
493 Metagenomic Sequencing for Pediatric Meningitis in Bangladesh Reveals Neuroinvasive Chikungunya  
494 Virus Outbreak and Other Unrealized Pathogens. *mBio*. 2019 Dec 17;10(6):e02877-19.
- 495 17. Booss, J. & Esiri, M. M. *Viral encephalitis in humans*. 2003. Washington, DC: American Society  
496 for Microbiology Press.

- 497 18. Patricia J Simner, Steven Miller, Karen C Carroll, Understanding the Promises and Hurdles of  
498 Metagenomic Next-Generation Sequencing as a Diagnostic Tool for Infectious Diseases, *Clinical*  
499 *Infectious Diseases*, Volume 66, Issue 5, 1 March 2018, Pages 778–788
- 500 19. Ryan C. Shean & Alexander L. Greninger. One future of clinical metagenomic sequencing for  
501 infectious diseases, *Expert Review of Molecular Diagnostics*. 2019. 19:10, 849-851.
- 502 20. Phillips KA, Douglas MP, Marshall DA. Expanding Use of Clinical Genome Sequencing and the  
503 Need for More Data on Implementation. *JAMA*. 2020. Nov 24;324(20):2029-2030.
- 504 21. Gilbert GL. Molecular diagnostics in infectious diseases and public health microbiology: cottage  
505 industry to postgenomics. *Trends Mol Med*. 2002. 8(6):280-7.
- 506 22. Dwivedi, S., Purohit, P., Misra, R. et al. Diseases and Molecular Diagnostics: A Step Closer to  
507 Precision Medicine. *Ind J Clin Biochem*. 2007. 32, 374–398
- 508 23. Krishna NK, Cunnion KM. Role of molecular diagnostics in the management of infectious disease  
509 emergencies. *Med Clin North Am*. 2012. 96(6):1067-78.
- 510 24. Wilson MR, O'Donovan BD, Gelfand JM, Sample HA, Chow FC, Betjemann JP, Shah MP, Richie  
511 MB, Gorman MP, Hajj-Ali RA, Calabrese LH, Zorn KC, Chow ED, Greenlee JE, Blum JH, Green G,  
512 Khan LM, Banerji D, Langelier C, Bryson-Cahn C, Harrington W, Lingappa JR, Shanbhag NM, Green  
513 AJ, Brew BJ, Soldatos A, Strnad L, Doernberg SB, Jay CA, Douglas V, Josephson SA, DeRisi JL.  
514 Chronic meningitis investigated via metagenomic next-generation sequencing. *JAMA Neurol*. 2018.  
515 75:947–955.
- 516 25. Langelier C, Kalantar KL, Moazed F, Wilson MR, Crawford E, Deiss T, Belzer A, Bolourchi S,  
517 Caldera S, Fung M, Jauregui A, Malcolm K, Lyden A, Khan L, Vessel K, Quan J, Zinter M, Chiu CY,  
518 Chow ED, Wilson J, Miller S, Matthay MA, Pollard KS, Christenson S, Calfee CS, DeRisi JL.  
519 Integrating host response and unbiased microbe detection for lower respiratory tract infection diagnosis  
520 in critically ill adults. *Proc Natl Acad Sci USA*. 2018. 115:E12353–E12362.

- 521 26. Wilson MR, Sample HA, Zorn KC, Arevalo S, Yu G, Neuhaus J, Federman S, Stryke D, Briggs B,  
522 Langelier C, Berger A, Douglas V, Josephson SA, Chow FC, Fulton BD, DeRisi JL, Gelfand JM,  
523 Naccache SN, Bender J, Dien Bard J, Murkey J, Carlson M, Vespa PM, Vijayan T, Allyn PR, Campeau  
524 S, Humphries RM, Klausner JD, Ganzon CD, Memar F, Ocampo NA, Zimmermann LL, Cohen SH,  
525 Polage CR, DeBiasi RL, Haller B, Dallas R, Maron G, Hayden R, Messacar K, Dominguez SR, Miller  
526 S, Chiu CY. Clinical Metagenomic Sequencing for Diagnosis of Meningitis and Encephalitis. *N Engl J*  
527 *Med.* 2019 Jun 13;380(24):2327-2340.
- 528 27. Kalantar KL, Carvalho T, de Bourcy CFA, Dimitrov B, Dingle G, Egger R, Han J, Holmes OB,  
529 Juan YF, King R, Kislyuk A, Lin MF, Mariano M, Morse T, Reynoso LV, Cruz DR, Sheu J, Tang J,  
530 Wang J, Zhang MA, Zhong E, Ahyong V, Lay S, Chea S, Bohl JA, Manning JE, Tato CM, DeRisi JL.  
531 IDseq-An open source cloud-based pipeline and analysis service for metagenomic pathogen detection  
532 and monitoring. *Gigascience.* 2020 Oct 15;9(10):giaa111.
- 533 28. Namvar L, Olofsson S, Bergström T, Lindh M. Detection and typing of Herpes Simplex virus  
534 (HSV) in mucocutaneous samples by TaqMan PCR targeting a gB segment homologous for HSV types  
535 1 and 2. *J Clin Microbiol.* 2005 May;43(5):2058-64.
- 536 29. Bachtler,M., Frey,B.M., Frey,F.J., Gorgievski,M., Simonetti,G. and Pasch,A Role of enteroviruses  
537 in mesangial renal disease [Unpublished]
- 538 30. Quinn KK, Wollersheim SK, Krogstad P. Complete Genome Sequence of Coxsackievirus B1  
539 Isolated during Case Outbreaks in 2007 in the United States. *Genome Announc.* 2014 Jul  
540 24;2(4):e00574-14. doi: 10.1128/genomeA.00574-14. PMID: 25059857; PMCID: PMC4110215.
- 541 31. Bavelaar HH, Rahamat-Langendoen J, Niesters HG, Zoll J, Melchers WJ. Whole genome  
542 sequencing of fecal samples as a tool for the diagnosis and genetic characterization of norovirus. *J Clin*  
543 *Virol.* 2015 Nov;72:122-5. doi: 10.1016/j.jcv.2015.10.003. Epub 2015 Nov 6. PMID: 26492615.]



- 544 32. Prasertsophon,J., Sangsiriwut,K., Noisumdaeng,P., Buathong,R. and Puthavathana,P. Enterovirus-  
545 associated hand, foot and mouth diseases in Thailand JOURNAL Unpublished. S ubmitted (26-JAN-  
546 2022)]
- 547 33. Chehadeh,W., Maimoona,S. and Kurien,S.S. Molecular characterization of coxsackievirus B1  
548 isolated from 1-year-old child with respiratory distress. JOURNAL Unpublished. Submitted 7 Dec  
549 2014.
- 550 34. Zhang T, Du J, Xue Y, Su H, Yang F, Jin Q. Epidemics and Frequent Recombination within  
551 Species in Outbreaks of Human Enterovirus B-Associated Hand, Foot and Mouth Disease in Shandong  
552 China in 2010 and 2011. PLoS One. 2013 Jun 19;8(6):e67157. doi: 10.1371/journal.pone.0067157.  
553 PMID: 23840610; PMCID: PMC3686723.
- 554 35. CZID Portal. <https://czid.org>. Accessed July 2022
- 555 36. WHO. Enterovirus Surveillance Guidelines. WHO Regional Office for Europe. 2015. Available at:  
556 [https://www.euro.who.int/\\_\\_data/assets/pdf\\_file/0020/272810/EnterovirusSurveillanceGuidelines.pdf](https://www.euro.who.int/__data/assets/pdf_file/0020/272810/EnterovirusSurveillanceGuidelines.pdf)
- 557 37. Rayamajhi, et al. Evaluating cognitive outcomes in adult patients with acute encephalitis syndrome:  
558 a prospective study from a tertiary care center in Nepal. Encephalitis. 2022; 2(2): 36-44
- 559 38. Thapa et al. Clinical profile and outcome of acute encephalitis syndrome (AES) patients treated in  
560 College of Medical Sciences-Teaching Hospital. Journal of College of Medical Sciences. 2013. Vol 9,  
561 No.2, 31-37.)
- 562 39. Rayamajhi, A., Ansari, I., Ledger, E. et al. Clinical and prognostic features among children with  
563 acute encephalitis syndrome in Nepal; a retrospective study. BMC Infect Dis 11, 294 (2011).  
564 <https://doi.org/10.1186/1471-2334-11-294> AND
- 565 40. Griffiths MJ, Lemon JV, Rayamajhi A, Poudel P, Shrestha P, Srivastav V, et al. (2013) The  
566 Functional, Social and Economic Impact of Acute Encephalitis Syndrome in Nepal – a Longitudinal  
567 Follow-Up Study. PLoS Negl Trop Dis 7(9): e2383. AND

- 568 41. Roy DB, Khatri HV. Study of Demographic Profile, Etiology, and Clinical Outcome in Patients  
569 Admitted With Acute Encephalitis Syndrome From the Western Part of India. *Cureus*. 2022 Mar  
570 11;14(3):e23085. doi: 10.7759/cureus.23085. PMID: 35464588; PMCID: PMC9001832. And
- 571 42. Jmor, F., Emsley, H.C., Fischer, M. et al. The incidence of acute encephalitis syndrome in Western  
572 industrialised and tropical countries. *Virology* 5, 134 (2008). <https://doi.org/10.1186/1743-422X-5-134>
- 573 43. Clinical presentation, etiology, and survival in adult acute encephalitis syndrome in rural Central  
574 India. Joshi R, Mishra PK, Joshi D, et al. <https://doi.org/10.1016/j.clineuro.2013.04.008>. *Clin Neurol*  
575 *Neurosurg*. 2013;115:1753–1761.
- 576 44. Roy DB, Khatri HV. Study of Demographic Profile, Etiology, and Clinical Outcome in Patients  
577 Admitted With Acute Encephalitis Syndrome From the Western Part of India. *Cureus*. 2022 Mar  
578 11;14(3):e23085. doi: 10.7759/cureus.23085. PMID: 35464588; PMCID: PMC9001832.
- 579 45. Thomas T, Gilbert J, Meyer F. Metagenomics - a guide from sampling to data analysis. *Microb*  
580 *Inform Exp*. 2012 Feb 9;2(1):3.
- 581 46. CZID Portal. <https://chanzuckerberg.zendesk.com/hc/en-us>. Accessed July 2022.
- 582 47. Zinter MS, Dvorak CC, Mayday MY, Iwanaga K, Ly NP, McGarry ME, Church GD, Faricy LE,  
583 Rowan CM, Hume JR, Steiner ME, Crawford ED, Langelier C, Kalantar K, Chow ED, Miller S,  
584 Shimano K, Melton A, Yanik GA, Sapru A, DeRisi JL. Pulmonary Metagenomic Sequencing Suggests  
585 Missed Infections in Immunocompromised Children. *Clin Infect Dis*. 2019 May 17;68(11):1847-1855
- 586 48. Ayling M, Clark MD, Leggett RM. New approaches for metagenome assembly with short reads.  
587 *Brief Bioinform*. 2020 Mar 23;21(2):584-594.
- 588 49. Miller S, Naccache SN, Samayoa E, Messacar K, Arevalo S, Federman S, Stryke D, Pham E, Fung  
589 B, Bolosky WJ, Ingebrigtsen D, Lorzio W, Paff SM, Leake JA, Pesano R, DeBiasi R, Dominguez S,  
590 Chiu CY. Laboratory validation of a clinical metagenomic sequencing assay for pathogen detection in  
591 cerebrospinal fluid. *Genome Res*. 2019. 29:831–842.

- 592 50. Gu W, Crawford ED, O'Donovan BD, Wilson MR, Chow ED, Retallack H, DeRisi JL. Depletion  
593 of abundant sequences by hybridization (DASH): using Cas9 to remove unwanted high-abundance  
594 species in sequencing libraries and molecular counting applications. *Genome Biol.* 2016. 17:41.
- 595 51. Quan J, Langelier C, Kuchta A, Batson J, Teyssier N, Lyden A, Caldera S, McGeever A, Dimitrov  
596 B, King R, Wilhelm J, Murphy M, Ares LP, Travisano KA, Sit R, Amato R, Mumbengegwi DR, Smith  
597 JL, Bennett A, Gosling R, Mourani PM, Calfee CS, Neff NF, Chow ED, Kim PS, Greenhouse B,  
598 DeRisi JL, Crawford ED. FLASH: a next-generation CRISPR diagnostic for multiplexed detection of  
599 antimicrobial resistance sequences. *Nucleic Acids Res.* 2019. 47:e83.
- 600 52. Carneiro, V.C.d., Alves-Leon, S.V., Sarmiento, D.J.d. et al. Herpesvirus and neurological  
601 manifestations in patients with severe coronavirus disease. *Virol J* 2022. 19, 10.
- 602 53. Patil S, Beck P, Nelson TB, Bran A, Roland W. Herpes Simplex Virus-2 Meningoencephalitis With  
603 Abducens Nerve Palsy With Literature Review. *Cureus.* 2021 Jun 8;13(6):e15523
- 604 54. Kumar A, Shukla D, Kumar R, Idris MZ, Misra UK, Dhole TN. Molecular epidemiological study  
605 of enteroviruses associated with encephalitis in children from India. *J Clin Microbiol.* 2012. 50:3509–  
606 3512.
- 607 55. Jain S, Patel B, Bhatt GC. Enteroviral encephalitis in children: clinical features, pathophysiology,  
608 and treatment advances. *Pathog Glob Health.* 2014 Jul;108(5):216-22
- 609 56. Calvo C, Gallardo P, Torija P, Bellón S, Méndez-Echeverría A, Del Rosal T, Baquero-Artigao F,  
610 Sainz T, Romero M, Cabrerizo M. Enterovirus neurological disease and bacterial coinfection in very  
611 young infants with fever. *J Clin Virol.* 2016 Dec;85:37-39
- 612 57. "Genus: Enterovirus". International Committee on Taxonomy of Viruses (ICTV). Accessed: 18  
613 July 2022. Derivation of names Entero: from Greek enteron, 'intestine'
- 614 58. Chaudhary MC, Bronze MS. Enterovirus Infection. *Medscape: Infectious Diseases.* 2019.  
615 Accessed: 18 July 2022.

- 616 59. Glaser CA, Gilliam S, Schnurr D et al. In search of encephalitis etiologies: diagnostic challenges in  
617 the California Encephalitis Project, 1998–2000. *Clin. Infect. Dis.* 2003. 36(6), 731–742.
- 618 60. Gofshteyn J, Cárdenas AM, Bearden D. Treatment of chronic enterovirus encephalitis with  
619 fluoxetine in a patient with X-linked agammaglobulinemia. *Pediatr. Neurol.* 2016. 64, 94–98.
- 620 61. Wikswo ME, Khetsuriani N, Fowlkes AL, Zheng X, Peñaranda S, Verma N, Shulman ST, Sircar K,  
621 Robinson CC, Schmidt T, Schnurr D, Oberste MS. Increased activity of Coxsackievirus B1 strains  
622 associated with severe disease among young infants in the United States, 2007-2008. *Clin Infect Dis.*  
623 2009 Sep 1;49(5):e44-51. doi: 10.1086/605090. PMID: 19622041
- 624 62. Sapkal GN Sapkal GN Bondre VP Fulmali PV. Enteroviruses in patients with acute encephalitis,  
625 Uttar Pradesh, India. *Emerg Infect Dis.* 2009. 15: 295-298.
- 626 63. Mittal M, Kushwaha KP, Pandey AK, Fore MM. A clinico-epidemiological study of acute  
627 encephalitis syndrome with multi organ dysfunction. *International Journal of Contemporary Pediatrics.*  
628 2017. 4(3).
- 629 64. Ravi V, Hameed SKS, Desai A, Mani RS, Reddy V, Velayudhan A, Yadav R, Jain A, Saikia L,  
630 Borthakur AK, Sharma A, Mohan DG, Bhandopadhyay B, Bhattacharya N, Inamdar L, Hossain S,  
631 Daves S, Sejvar J, Dhariwal AC, Sen PK, Venkatesh S, Prasad J, Laserson K, Srikantiah P. An  
632 algorithmic approach to identifying the aetiology of acute encephalitis syndrome in India: results of a  
633 4-year enhanced surveillance study. *Lancet Glob Health.* 2022 May;10(5):e685-e693.
- 634 65. Mittal M, Bondre V, Murhekar M, Deval H, Rose W, Verghese VP, Mittal M, Patil G, Sabarinathan  
635 R, Vivian Thangaraj JW, Kanagasabai K, Prakash JAJ, Gupta N, Gupte MM, Gupte MD. Acute  
636 Encephalitis Syndrome in Gorakhpur, Uttar Pradesh, 2016: Clinical and Laboratory Findings. *Pediatr*  
637 *Infect Dis J.* 2018 Nov;37(11):1101-1106
- 638 66. Kumar A, Shukla D, Kumar R, Idris MZ, Misra UK, Dhole TN. An epidemic of encephalitis  
639 associated with human enterovirus B in Uttar Pradesh, India, 2008. *J Clin Virol.* 2011 Jun;51(2):142-5.

- 640 67. Giri A, Arjyal A, Koirala S, Karkey A, Dongol S, Thapa SD, Shilpakar O, Shrestha R, van Tan L,  
641 Thi Thuy Chinh BN, Krishna K C R, Pathak KR, Shakya M, Farrar J, Van Doorn HR, Basnyat B.  
642 Aetiologies of central nervous system infections in adults in Kathmandu, Nepal: a prospective hospital-  
643 based study. *Sci Rep.* 2013;3:2382
- 644 68. Säll O, Thulin Hedberg S, Neander M, Tiwari S, Dornon L, Bom R, Lagerqvist N, Sundqvist M,  
645 Mölling P. Etiology of Central Nervous System Infections in a Rural Area of Nepal Using Molecular  
646 Approaches. *Am J Trop Med Hyg.* 2019 Jul;101(1):253-259.
- 647 69. Bookstaver PB, Mohorn PL, Shah A, Tesh LD, Quidley AM, Kothari R, Bland CM, Weissman S.  
648 Management of viral central nervous system infections: a primer for clinicians. *J Cent Nerv Syst Dis.*  
649 2017. 9.
- 650 70. AK AK, Mendez MD. Herpes Simplex Encephalitis. 2022 Mar 15. In: *StatPearls [Internet].*  
651 *Treasure Island (FL): StatPearls Publishing; 2022 Jan–.* PMID: 32491575.
- 652 71. Khetsuriani, N., Holman, R. C. & Anderson, L. J. Burden of encephalitis-associated  
653 hospitalizations in the United States, 1988–1997. *Clinical infectious diseases : an official publication of*  
654 *the Infectious Diseases Society of America.* 2002. 35. 175–182.
- 655 72. Davison, K. L., Crowcroft, N. S., Ramsay, M. E., Brown, D. W. & Andrews, N. J. Viral  
656 encephalitis in England, 1989–1998: what did we miss? *Emerging infectious diseases.* 2003. 9. 234–  
657 240.
- 658 73. Huppatz, C. et al. Etiology of encephalitis in Australia, 1990–2007. *Emerging infectious diseases.*  
659 2009. 15. 1359–1365.
- 660 74. Panagariya A, Jain RS, Gupta S, Garg A, Sureka RK, Mathur V. Herpes simplex encephalitis in  
661 North West India. *Neurol India.* 2001 Dec;49(4):360-5
- 662 75. Bradshaw MJ, Venkatesan A. Herpes Simplex Virus-1 Encephalitis in Adults: Pathophysiology,  
663 Diagnosis, and Management. *Neurotherapeutics.* 2016 Jul;13(3):493-508.

- 664 76. Kubo T, Rai SK, Nakanishi M, Yamano T. Seroepidemiological study of herpes viruses in Nepal.  
665 Southeast Asian J Trop Med Public Health. 1991 Sep;22(3):323-5
- 666 77. Adhikari A. A Case Report on Herpes Simplex Encephalitis. Medical Journal of Shree Birendra  
667 Hospital. 2012. 11(1).
- 668 78. Rayamajhi P, Nepal G, Ojha R, Rajbhandari R, Gajurel BP, Karn R. Evaluating cognitive outcomes  
669 in adult patients with acute encephalitis syndrome: a prospective study from a tertiary care center in  
670 Nepal. 2022. 2(2). 36-44.
- 671 79. Ramesh A, Nakielny S, Hsu J, Kyohere M, Byaruhanga O, de Bourcy C, Egger R, Dimitrov B,  
672 Juan YF, Sheu J, Wang J, Kalantar K, Langelier C, Ruel T, Mpimbaza A, Wilson MR, Rosenthal PJ,  
673 DeRisi JL. Metagenomic next-generation sequencing of samples from pediatric febrile illness in  
674 Tororo, Uganda. PLoS One. 2019 Jun 20;14(6):e0218318.
- 675 80. Institute of Medicine (US) Roundtable on Value & Science-Driven Health Care. Clinical Data as  
676 the Basic Staple of Health Learning: Creating and Protecting a Public Good: Workshop Summary.  
677 Washington (DC): National Academies Press (US); 2010. Available from:  
678 <https://www.ncbi.nlm.nih.gov/books/NBK54302/>
- 679 81. Leys NM, Ryngaert A, Bastiaens L, Verstraete W, Top EM, Springael D. Occurrence and  
680 phylogenetic diversity of Sphingomonas strains in soils contaminated with polycyclic aromatic  
681 hydrocarbons. Appl Environ Microbiol. 2004 Apr;70(4):1944-55
- 682 82. Cavicchioli R, Fegatella F, Ostrowski M, Eguchi M, Gottschal J. Sphingomonads from marine  
683 environments. J Ind Microbiol Biotechnol. 1999 Oct;23(4-5):268-272.
- 684 83. Thraenhart O, Jursch C. Virucidal activity of the nucleic acid preservation product “DNA/RNA  
685 Shield” against the murine parvovirus (MVM) at 20°C. 2018. Eurovir.
- 686 84. Phommanivong, V., Kanda, S., Shimono, T. et al. Co-circulation of the dengue with chikungunya  
687 virus during the 2013 outbreak in the southern part of Lao PDR. Trop Med Health. 2016. 44. 24

- 688 85. New York State Department of Health. Collection and Submission of Specimens for Viral  
689 Encephalitis Testing. July 2010.
- 690 86. seq100 Specifications. Accessed: 18 July 2022. Available at  
691 <https://support.illumina.com/bulletins/2020/04/maximum-read-length-for-illumina-sequencing->  
692 [platforms.html](https://support.illumina.com/bulletins/2020/04/maximum-read-length-for-illumina-sequencing-platforms.html)
